# Supplementary material for: The Strengthening Relationship between Eurasian Snow Cover and December Haze Days in Central North China after the Mid-1990s
Source: Copernicus journal article supplement (doi:10.5194/acp-2017-1055), 2017-12-21
Supplement: Supplementary file 1 [file acp-2017-1055-supplement.pdf]

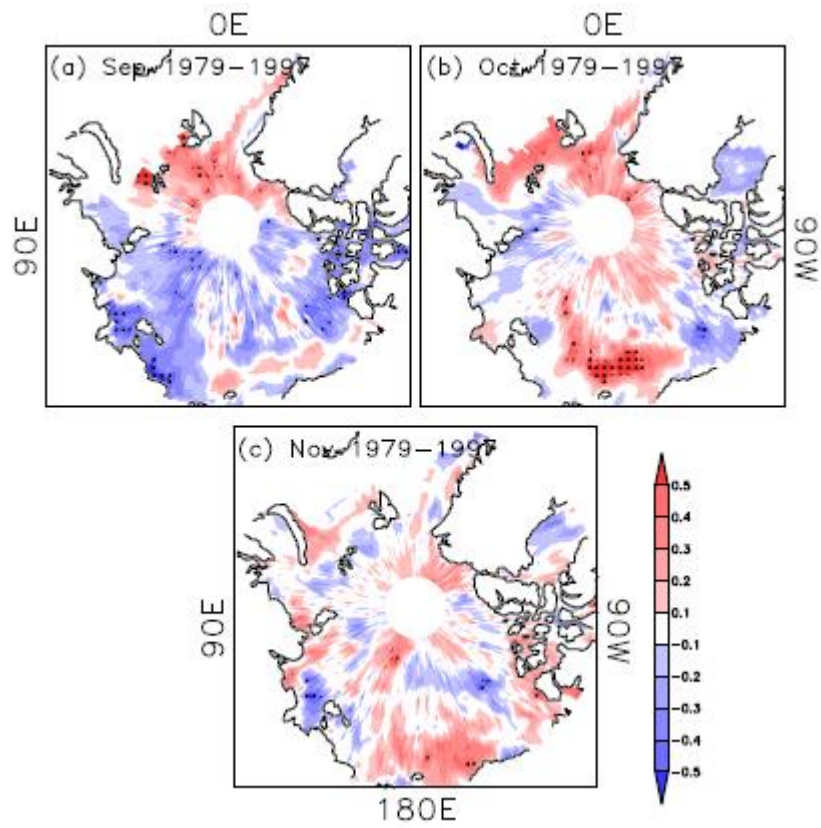

**Figure S1.** The CC between SCES and September (a), October (b) and November (c) Arctic sea ice from 1979 to 1997 after detrending. The black dots indicate CC exceeding the 95% confidence level (t test).

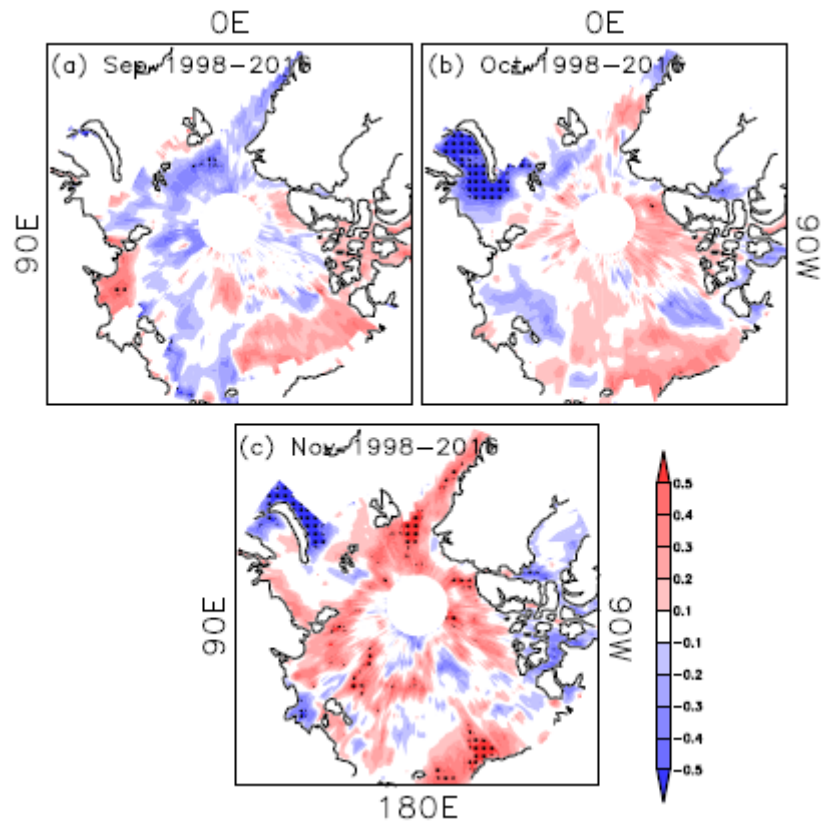

**Figure S2.** The CC between SCES and September (a), October (b) and November (c) Arctic sea ice from 1998 to 2016 after detrending. The black dots indicate CC exceeding the 95% confidence level (t test).
